# Supplementary material
Source: Springer Nature journal article supplement (https://www.springermedizin.de/resource/supplementary/12939_2011_228_MOESM4_ESM.pdf/9550648)

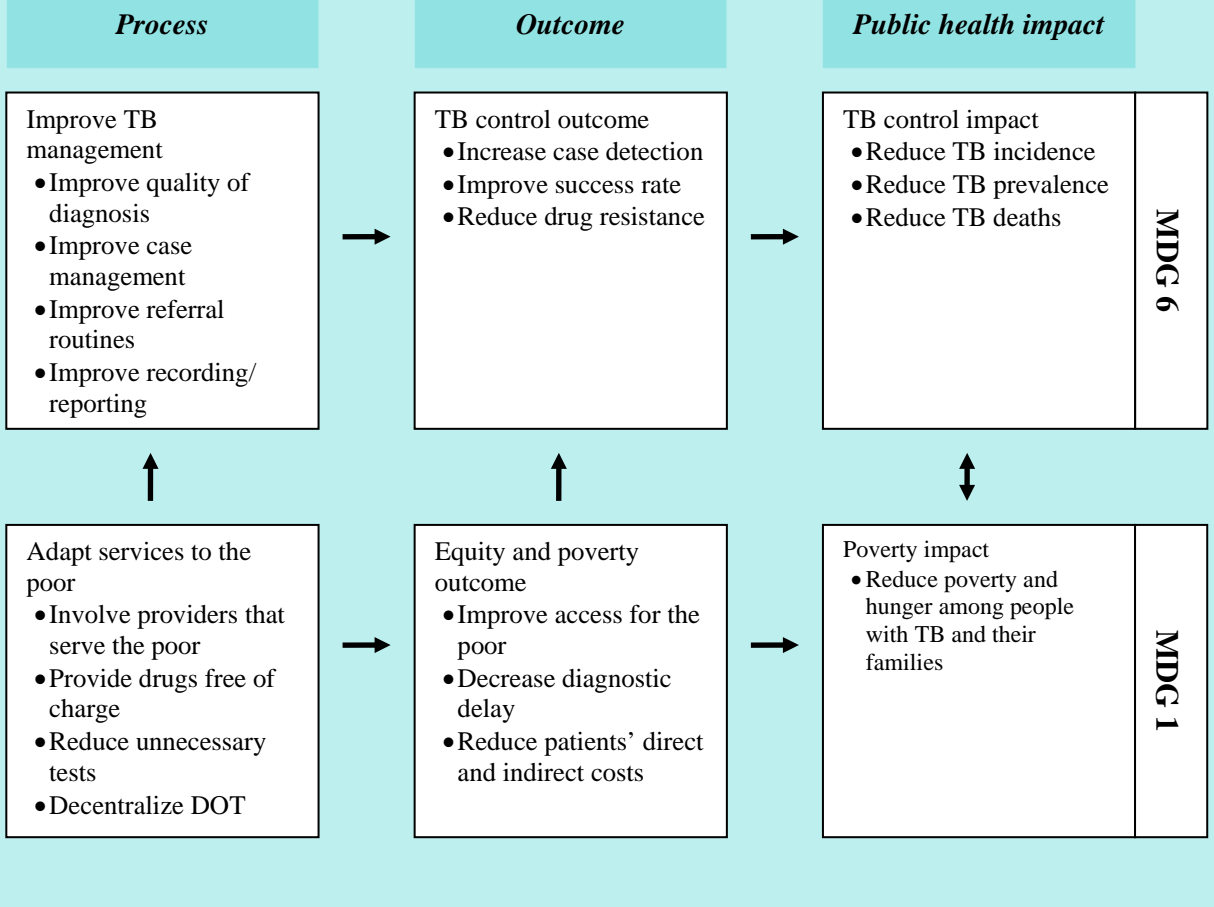

Supplement: MOESM4 [file 9550648]
